# Supplementary material
Source: PubMed Central journal article supplement (PMC2588485)
Supplement: NIHMS50276-supplement-01.pdf [file NIHMS50276-supplement-01.pdf]

# Web-based Supplementary Materials for “Comparing trends in cancer rates across overlapping regions” by Y. Li and R. Tiwari

## Derivation of Equation (8)

To proceed, we assume that  $t_1 \leq t_{s+1} < t_m \leq t_{s+I}$  and note that

$$\begin{aligned} Cov(\hat{\beta}_{11}, \hat{\beta}_{21}) &= \frac{1}{\sigma_1^2 \sigma_2^2} Cov \left\{ \sum_{i=1}^m (t_i - \bar{t}_1) y_{1i}, \sum_{s+1}^{s+I} (t_i - \bar{t}_2) y_{2i} \right\} \\ &= \frac{1}{\sigma_1^2 \sigma_2^2} \sum_{s+1}^m (t_i - \bar{t}_1)(t_i - \bar{t}_2) Cov(y_{1i}, y_{2i}). \end{aligned} \quad (14)$$

Recall that we use superscript ‘O’ to denote the intersection of Regions 1 and 2 and ‘NO’ the non-overlapping subset. We further introduce the following notation. Let  $n_{kji}$ ,  $n_{kji}^{(O)}$  and  $n_{kji}^{(NO)}$  be the numbers of underlying population at risk for age group  $j$  at time  $t_i$  in Region  $k$  ( $k = 1, 2$ ), in the overlapping subregion and in the non-overlapping subregions, respectively. Similarly, define  $d_{kji}$ ,  $d_{kji}^{(O)}$  and  $d_{kji}^{(NO)}$  the corresponding numbers of events (e.g. deaths or cancer cases). Denote by  $n_{ki} = \sum_{j=1}^J n_{kji}$ ,  $n_{ki}^{(O)} = \sum_{j=1}^J n_{kji}^{(O)}$ ,  $n_{ki}^{(NO)} = \sum_{j=1}^J n_{kji}^{(NO)}$ . Also define  $d_{ki}$ ,  $d_{ki}^{(O)}$  and  $d_{ki}^{(NO)}$  in the similar fashion. In fact,  $d_{kji}^{(O)}$  and  $n_{kji}^{(O)}$  are independent of index  $k$  (for region) as they correspond to the same common subregion for  $k = 1, 2$ .

Let  $y_i^{(O)} = \log(r_i^{(O)}) = \log \left( \sum_{j=1}^J w_j \frac{d_{ji}^{(O)} + 1/J}{n_{ji}^{(O)}} \right)$  be the logarithm of the (zero corrected) age-adjusted rate  $r_i^{(O)}$  at time  $t_i$  for the overlapping region, and let  $y_{1i}^{(NO)}$  and  $y_{2i}^{(NO)}$  be defined similarly based on  $r_{1i}^{(NO)}$  and  $r_{2i}^{(NO)}$ , respectively, for the non-overlapping regions/intervals for the two groups.

Dropping the subscript  $i$  (for time), we assume the age groups have the same distribution across the overlapping and non-overlapping regions, that is,

$$\frac{n_{k1}^{(O)}}{n_{k1}} = \frac{n_{k2}^{(O)}}{n_{k2}} = \dots = \frac{n_{kJ}^{(O)}}{n_{kJ}} = p_k^{(O)}, \text{ and } \frac{n_{k1}^{(NO)}}{n_{k1}} = \frac{n_{k2}^{(NO)}}{n_{k2}} = \dots = \frac{n_{kJ}^{(NO)}}{n_{kJ}} = p_k^{(NO)}, \quad (15)$$

for  $k=1,2$ . This assumption is common in comparing the age-adjusted rates across different geographical areas (see, e.g., Pickle and White, 1995), under which, we have

$$r_k = \sum_{j=1}^J w_j \frac{d_{kj}}{n_{kj}} = \sum_{j=1}^J w_j \frac{d_{kj}^{(O)} + d_{kj}^{(NO)}}{n_{kj}}$$

$$\begin{aligned}
&= \sum_{j=1}^J w_j \frac{n_{kj}^{(O)} d_{kj}^{(O)} + 1/J}{n_{kj}^{(O)}} + \sum_{j=1}^J w_j \frac{n_{kj}^{(NO)} d_{kj}^{(NO)} + 1/J}{n_{kj}^{(NO)}} + c_k \\
&= p_k^{(O)} r_k^{(O)} + p_k^{(NO)} r_k^{(NO)} + c_k,
\end{aligned}$$

where  $c_k = -\frac{1}{J} \sum_{j=1}^J \frac{w_j}{n_{kj}}$ , a negligible constant. Again, since  $r_1^{(O)} = r_2^{(O)}$ , let  $r^{(O)}$  denote this common value, and let  $y^{(O)} = \log(r^{(O)})$ . Now, since  $Cov(r_1^{(NO)}, r_2^{(NO)}) = 0$  and  $Cov(r^{(O)}, r_k^{(NO)}) = 0, k = 1, 2$ , using the delta method, we have,

$$\begin{aligned}
Cov(y_1, y_2) &= Cov(\log(r_1), \log(r_2)) \\
&\approx \frac{1}{E(r_1)E(r_2)} Cov(r_1, r_2) \\
&= \frac{1}{E(r_1)E(r_2)} p_1^{(O)} p_2^{(O)} Var(r^{(O)}) \\
&= \frac{1}{E(r_1)E(r_2)} p_1^{(O)} p_2^{(O)} Var(e^{y^{(O)}}).
\end{aligned}$$

Let  $y^{(O)}$  satisfy the regression model (3), and let  $\mu^{(O)} = E(y^{(O)})$ . Since  $y^{(O)} \sim N(\mu^{(O)}, \sigma^2)$ , using the properties of that log normal distribution, we have that

$$\begin{aligned}
E(r^{(O)}) &= E(e^{y^{(O)}}) = e^{\mu^{(O)}} e^{\sigma^2/2}, \\
Var(e^{y^{(O)}}) &= e^{2\mu^{(O)}} e^{\sigma^2} (e^{\sigma^2} - 1).
\end{aligned}$$

Furthermore, the null hypothesis implies that  $E(y_1) = E(y_2) = E(y^{(O)})$ . Hence, adding back the time index  $i$ , we will have

$$\begin{aligned}
Cov(y_{1i}, y_{2i}) &= (e^{\sigma^2} - 1) p_{1i}^{(O)} p_{2i}^{(O)} \\
&\approx \sigma^2 p_{1i}^{(O)} p_{2i}^{(O)},
\end{aligned}$$

when  $\sigma^2$  is small. For the US population,  $p_{1i}^{(O)}$  and  $p_{2i}^{(O)}$  were found to be constant over years (as confirmed by the SEER population data base). We then write  $p_{ki}^{(O)} \equiv p_k^{(O)}$  for  $i = s+1, \dots, m$ , an estimate of which is given by  $\hat{p}_k^{(O)} = \frac{n^{(O)}}{n_k}$ , where  $n_k = \sum_{i=s+1}^m \sum_{j=1}^J n_{kji}$  and  $n^{(O)} = \sum_{i=s+1}^m \sum_{j=1}^J n_{ji}^{(O)}$ . Hence,  $Cov(y_{1i}, y_{2i}) \approx \sigma^2 \frac{(n^{(O)})^2}{n_1 n_2}$  for  $i = s+1, \dots, m$ . Inserting it back to (14) yields (8).

## Tables for Data Analysis

Table A.1: Comparison of Changes in Age-adjusted cancer mortality rates between California (1990-2004) and the US (1988-2002) for males.  $APC_{us}$  and  $APC_{ca}$  are the annual percent changes for the US and California respectively.  $\sigma^2$  is the common (residual) variance in the Cancer Rate Regression Models (6) and (7).

| sites                        | $APC_{us}$ (SE)      | $APC_{ca}$ (SE)      | $\sigma^2$ | p-value (Z-test) | p-value (t-test) |
|------------------------------|----------------------|----------------------|------------|------------------|------------------|
| 1 All Malignant Cancers      | -1.14529 ( 0.08562 ) | -1.69304 ( 0.05924 ) | 0.01323    | 0.00000          | 0.00000          |
| 2 Oral Cavity and Pharynx    | -2.54187 ( 0.14183 ) | -2.36549 ( 0.30387 ) | 0.04262    | 0.61088          | 0.62439          |
| 3 Lip                        | -5.04715 ( 0.93868 ) | -2.89026 ( 2.28470 ) | 0.31393    | 0.39824          | 0.41626          |
| 4 Tongue                     | -2.30819 ( 0.17872 ) | -1.55945 ( 0.48771 ) | 0.06602    | 0.16317          | 0.17961          |
| 5 Salivary Gland             | -1.21958 ( 0.39018 ) | -2.69678 ( 0.88342 ) | 0.12274    | 0.13895          | 0.15445          |
| 6 Floor of Mouth             | -8.74256 ( 0.54619 ) | -4.60891 ( 1.60742 ) | 0.21577    | 0.01850          | 0.02341          |
| 7 Gum and Other Mouth        | -3.59892 ( 0.31909 ) | -4.57622 ( 0.45483 ) | 0.07062    | 0.08882          | 0.10152          |
| 8 Nasopharynx                | -2.60014 ( 0.26453 ) | -2.52804 ( 0.67281 ) | 0.09188    | 0.92313          | 0.92602          |
| 9 Tonsil                     | -1.62000 ( 0.39344 ) | -0.51149 ( 0.97421 ) | 0.13354    | 0.30741          | 0.32600          |
| 10 Oropharynx                | -1.02095 ( 0.33416 ) | -0.57017 ( 0.97536 ) | 0.13104    | 0.67232          | 0.68399          |
| 11 Hypopharynx               | -5.54162 ( 0.33743 ) | -3.08101 ( 0.99334 ) | 0.13334    | 0.02327          | 0.02900          |
| 12 Other Oral Cavity and Pha | -1.57741 ( 0.31890 ) | -2.39696 ( 0.72259 ) | 0.10039    | 0.31547          | 0.33405          |
| 13 Digestive System          | -1.00699 ( 0.03420 ) | -1.03053 ( 0.06669 ) | 0.00953    | 0.76122          | 0.76996          |
| 14 Esophagus                 | 0.74199 ( 0.04981 )  | 0.03682 ( 0.26946 )  | 0.03483    | 0.01279          | 0.01659          |
| 15 Stomach                   | -3.18066 ( 0.14032 ) | -2.74636 ( 0.15274 ) | 0.02636    | 0.04280          | 0.05126          |
| 16 Small Intestine           | -0.71617 ( 0.35911 ) | -2.28962 ( 0.82727 ) | 0.11462    | 0.09145          | 0.10433          |
| 17 Colon and Rectum          | -1.98524 ( 0.04743 ) | -2.30563 ( 0.10036 ) | 0.01411    | 0.00523          | 0.00721          |
| 18 Colon excluding Rectum    | -2.18078 ( 0.05359 ) | -2.36600 ( 0.11226 ) | 0.01581    | 0.14974          | 0.16569          |
| 19 Rectum and Rectosigmoid J | -0.88380 ( 0.07602 ) | -2.00738 ( 0.31554 ) | 0.04125    | 0.00081          | 0.00127          |
| 20 Liver and Intrahepatic Bi | 2.70060 ( 0.16143 )  | 2.85857 ( 0.19285 )  | 0.03196    | 0.54342          | 0.55871          |
| 21 Liver                     | 2.31905 ( 0.13813 )  | 2.71266 ( 0.22187 )  | 0.03322    | 0.14513          | 0.16090          |
| 22 Intrahepatic Bile Duct    | 4.89523 ( 0.40718 )  | 3.73589 ( 0.51502 )  | 0.08344    | 0.08758          | 0.10019          |
| 23 Gallbladder               | -2.10738 ( 0.22285 ) | -1.53995 ( 0.48949 ) | 0.06836    | 0.30742          | 0.32600          |
| 24 Other Biliary             | -3.39084 ( 0.23329 ) | -3.65275 ( 0.53714 ) | 0.07443    | 0.66526          | 0.67715          |
| 25 Pancreas                  | -0.29431 ( 0.05214 ) | -0.39426 ( 0.19401 ) | 0.02553    | 0.63031          | 0.64325          |
| 26 Retroperitoneum           | -4.12158 ( 0.58644 ) | -2.68420 ( 1.11387 ) | 0.15999    | 0.26932          | 0.28778          |
| 27 Peritoneum, Omentum and M | -0.90453 ( 0.66323 ) | 4.60791 ( 1.42707 )  | 0.20001    | 0.00070          | 0.00111          |
| 28 Other Digestive Organs    | 3.32072 ( 1.36339 )  | 3.54776 ( 2.10751 )  | 0.31902    | 0.93027          | 0.93289          |
| 29 Respiratory System        | -1.60133 ( 0.08997 ) | -2.54261 ( 0.08343 ) | 0.01559    | 0.00000          | 0.00000          |
| 30 Nose, Nasal Cavity and Mi | -2.45896 ( 0.36930 ) | -3.71470 ( 1.15055 ) | 0.15358    | 0.31473          | 0.33332          |
| 31 Larynx                    | -1.89041 ( 0.15676 ) | -2.21785 ( 0.41215 ) | 0.05604    | 0.47254          | 0.48938          |
| 32 Lung and Bronchus         | -1.57318 ( 0.08800 ) | -2.53538 ( 0.08350 ) | 0.01542    | 0.00000          | 0.00000          |
| 33 Pleura                    | -4.76359 ( 0.69374 ) | -5.63373 ( 0.83073 ) | 0.13756    | 0.43671          | 0.45418          |
| 34 Trachea, Mediastinum and  | -4.38175 ( 0.56495 ) | -4.21490 ( 1.43052 ) | 0.19548    | 0.91642          | 0.91956          |
| 35 Bones and Joints          | -0.63050 ( 0.22877 ) | -0.50710 ( 0.56841 ) | 0.07787    | 0.07247          | 0.08391          |
| 36 Soft Tissue including Hea | -0.19405 ( 0.32414 ) | -1.86636 ( 0.56160 ) | 0.08241    | 0.01260          | 0.01635          |
| 37 Skin excluding Basal and  | -0.20217 ( 0.08928 ) | -0.92676 ( 0.29656 ) | 0.03936    | 0.02362          | 0.02940          |
| 38 Melanoma of the Skin      | 0.22384 ( 0.14864 )  | -1.14511 ( 0.35312 ) | 0.04870    | 0.00055          | 0.00088          |
| 39 Other Non-Epithelial Skin | -1.28166 ( 0.33594 ) | -0.34737 ( 0.61161 ) | 0.08869    | 0.19523          | 0.21260          |
| 40 Breast                    | 0.67233 ( 0.44829 )  | -0.35521 ( 1.08577 ) | 0.14930    | 0.39743          | 0.41545          |
| 41 Male Genital System       | -2.17218 ( 0.34136 ) | -3.35652 ( 0.22018 ) | 0.05163    | 0.00479          | 0.00664          |
| 42 Prostate                  | -2.18583 ( 0.34814 ) | -3.40124 ( 0.21988 ) | 0.05233    | 0.00430          | 0.00600          |
| 43 Testis                    | -1.32447 ( 0.42559 ) | -1.31581 ( 0.90241 ) | 0.12681    | 0.99330          | 0.99355          |
| 44 Penis                     | -1.45769 ( 0.29383 ) | 0.44102 ( 1.74277 )  | 0.22463    | 0.29867          | 0.31724          |
| 45 Urinary System            | -0.15872 ( 0.06568 ) | -0.46994 ( 0.10662 ) | 0.01592    | 0.01621          | 0.02069          |
| 46 Urinary Bladder           | -0.39827 ( 0.07156 ) | -0.66431 ( 0.19502 ) | 0.02640    | 0.21539          | 0.23318          |
| 47 Kidney and Renal Pelvis   | 0.09973 ( 0.10326 )  | -0.20732 ( 0.16686 ) | 0.02494    | 0.13010          | 0.14520          |
| 48 Ureter                    | -1.81235 ( 0.36063 ) | -3.05155 ( 1.85441 ) | 0.24011    | 0.52571          | 0.54142          |
| 49 Other Urinary Organs      | 4.67508 ( 1.32642 )  | 4.13840 ( 2.59886 )  | 0.37084    | 0.85877          | 0.86404          |
| 50 Eye and Orbit             | -2.59686 ( 0.51488 ) | 2.06275 ( 1.37227 )  | 0.18629    | 0.00210          | 0.00308          |
| 51 Brain and Other Nervous S | -0.59408 ( 0.07447 ) | -0.76199 ( 0.27160 ) | 0.03579    | 0.56409          | 0.57886          |
| 52 Endocrine System          | 0.46159 ( 0.22153 )  | 0.94815 ( 0.49324 )  | 0.06872    | 0.38402          | 0.40219          |
| 53 Thyroid                   | 1.31809 ( 0.32622 )  | 2.55398 ( 0.66252 )  | 0.09386    | 0.10545          | 0.11923          |
| 54 Other Endocrine including | -0.51444 ( 0.26401 ) | -0.90111 ( 0.73065 ) | 0.09874    | 0.63017          | 0.64311          |
| 55 Lymphoma                  | 0.04612 ( 0.25417 )  | -0.90577 ( 0.31011 ) | 0.05096    | 0.02164          | 0.02710          |
| 56 Hodgkin Lymphoma          | -3.77024 ( 0.29593 ) | -2.91687 ( 0.50752 ) | 0.07467    | 0.15996          | 0.17630          |
| 57 Non-Hodgkin Lymphoma      | 0.32123 ( 0.28472 )  | -0.76903 ( 0.33308 ) | 0.05569    | 0.01608          | 0.02054          |
| 58 Myeloma                   | 0.00492 ( 0.15560 )  | -0.63384 ( 0.28698 ) | 0.04149    | 0.05837          | 0.06852          |
| 59 Leukemia                  | -0.41114 ( 0.07777 ) | -1.16978 ( 0.18611 ) | 0.02564    | 0.00027          | 0.00046          |
| 60 Lymphocytic Leukemia      | -0.80381 ( 0.18393 ) | -1.43414 ( 0.38148 ) | 0.05383    | 0.14991          | 0.16587          |
| 61 Acute Lymphocytic Leukemi | -1.88621 ( 0.15635 ) | -0.61542 ( 0.70555 ) | 0.09185    | 0.08891          | 0.10162          |
| 62 Chronic Lymphocytic Leuke | -0.22980 ( 0.25973 ) | -1.58381 ( 0.39517 ) | 0.06010    | 0.00561          | 0.00769          |
| 63 Other Lymphocytic Leukemi | -3.11597 ( 0.26524 ) | -2.84172 ( 1.08602 ) | 0.14209    | 0.81241          | 0.81935          |
| 64 Myeloid and Monocytic Leu | 0.38178 ( 0.10812 )  | -0.34155 ( 0.26334 ) | 0.03618    | 0.01397          | 0.01801          |
| 65 Acute Myeloid Leukemia    | 1.85239 ( 0.13780 )  | 1.27926 ( 0.25779 )  | 0.03715    | 0.05786          | 0.06795          |
| 66 Acute Monocytic Leukemia  | -5.87966 ( 0.33270 ) | -5.81060 ( 1.38431 ) | 0.18095    | 0.96258          | 0.96398          |
| 67 Chronic Myeloid Leukemia  | -4.54161 ( 0.69213 ) | -7.48499 ( 0.97162 ) | 0.15162    | 0.01699          | 0.02162          |
| 68 Other Myeloid/Monocytic L | 3.25551 ( 1.82360 )  | 4.63431 ( 2.02953 )  | 0.34678    | 0.62494          | 0.63804          |
| 69 Other Leukemia            | -1.26579 ( 0.15121 ) | -2.35890 ( 0.35968 ) | 0.04959    | 0.00672          | 0.00910          |
| 70 Other Acute Leukemia      | -2.69076 ( 0.21664 ) | -4.26489 ( 0.44006 ) | 0.06234    | 0.00191          | 0.00281          |
| 71 Aleukemic, Subleukemic an | 0.19461 ( 0.25052 )  | -0.13660 ( 0.44085 ) | 0.06445    | 0.52745          | 0.54313          |
| 72 Miscellaneous Malignant C | -0.06793 ( 0.38400 ) | -0.04692 ( 0.33004 ) | 0.06435    | 0.96798          | 0.96919          |

Table A.2: Comparison of Changes in Age-adjusted cancer mortality rates between California (1990-2004) and the US (1988-2002) for females.

| sites                        | $APC_{us}$ (SE)      | $APC_{ca}$ (SE)      | $\sigma^2$ | p-value<br>(Z-test) | p-value<br>(t-test) |
|------------------------------|----------------------|----------------------|------------|---------------------|---------------------|
| 1 All Malignant Cancers      | -0.4967 ( 0.06367 )  | -1.1995 ( 0.07756 )  | 0.01275    | 0.00000             | 0.00000             |
| 2 Oral Cavity and Pharynx    | -2.3100 ( 0.09949 )  | -2.6478 ( 0.32027 )  | 0.04262    | 0.33065             | 0.34845             |
| 3 Tongue                     | -1.7552 ( 0.20731 )  | -1.9406 ( 0.56414 )  | 0.07639    | 0.76566             | 0.77390             |
| 4 Salivary Gland             | -1.5547 ( 0.28108 )  | -1.6580 ( 1.53080 )  | 0.19781    | 0.94885             | 0.95070             |
| 5 Floor of Mouth             | -8.5738 ( 0.59746 )  | -10.3092 ( 1.46769 ) | 0.20140    | 0.29016             | 0.30797             |
| 6 Gum and Other Mouth        | -2.4059 ( 0.33005 )  | -3.5480 ( 0.89911 )  | 0.12173    | 0.24941             | 0.26696             |
| 7 Nasopharynx                | -1.8134 ( 0.28784 )  | -1.7402 ( 1.07235 )  | 0.14112    | 0.94922             | 0.95105             |
| 8 Tonsil                     | -2.7779 ( 0.45408 )  | -3.0276 ( 1.09826 )  | 0.15105    | 0.83921             | 0.84495             |
| 9 Oropharynx                 | -0.5663 ( 0.55131 )  | -1.4113 ( 1.74661 )  | 0.23279    | 0.65585             | 0.66754             |
| 10 Hypopharynx               | -5.0032 ( 0.69969 )  | -2.0945 ( 2.10828 )  | 0.28233    | 0.20595             | 0.22284             |
| 11 Other Oral Cavity and Pha | -2.4089 ( 0.33467 )  | -2.6857 ( 0.96831 )  | 0.13021    | 0.79414             | 0.80143             |
| 12 Digestive System          | -0.9999 ( 0.03521 )  | -1.0174 ( 0.08568 )  | 0.01177    | 0.85554             | 0.86071             |
| 13 Esophagus                 | -0.1298 ( 0.09611 )  | -0.4936 ( 0.44040 )  | 0.05729    | 0.43558             | 0.45237             |
| 14 Stomach                   | -2.4744 ( 0.08503 )  | -2.2361 ( 0.26341 )  | 0.03518    | 0.40560             | 0.42281             |
| 15 Small Intestine           | -0.5498 ( 0.28495 )  | -1.1258 ( 0.59587 )  | 0.08395    | 0.39957             | 0.41685             |
| 16 Colon and Rectum          | -1.7837 ( 0.03854 )  | -2.1068 ( 0.12624 )  | 0.01678    | 0.01804             | 0.02266             |
| 17 Colon excluding Rectum    | -1.9450 ( 0.04393 )  | -2.0724 ( 0.12469 )  | 0.01680    | 0.35203             | 0.36973             |
| 18 Rectum and Rectosigmoid J | -0.6662 ( 0.09959 )  | -2.3023 ( 0.35657 )  | 0.04705    | 0.00002             | 0.00004             |
| 19 Anus, Anal Canal and Anor | 0.9835 ( 0.36923 )   | 1.4404 ( 0.50560 )   | 0.07957    | 0.48091             | 0.49693             |
| 20 Liver and Intrahepatic Bi | 2.1121 ( 0.22646 )   | 2.8416 ( 0.25130 )   | 0.04299    | 0.03727             | 0.04471             |
| 21 Liver                     | 1.0356 ( 0.23798 )   | 2.2415 ( 0.30421 )   | 0.04909    | 0.00256             | 0.00366             |
| 22 Intrahepatic Bile Duct    | 5.3993 ( 0.32153 )   | 4.6627 ( 0.45037 )   | 0.07033    | 0.19849             | 0.21523             |
| 23 Gallbladder               | -2.3486 ( 0.12983 )  | -1.7201 ( 0.32906 )  | 0.04496    | 0.08616             | 0.09815             |
| 24 Other Biliary             | -3.3533 ( 0.27122 )  | -3.2242 ( 0.98554 )  | 0.12992    | 0.90295             | 0.90645             |
| 25 Pancreas                  | 0.0459 ( 0.06003 )   | -0.3244 ( 0.14192 )  | 0.01958    | 0.02029             | 0.02529             |
| 26 Retroperitoneum           | -3.4767 ( 0.42605 )  | -2.4084 ( 2.15884 )  | 0.27968    | 0.63910             | 0.65128             |
| 27 Peritoneum, Omentum and M | 10.6773 ( 0.50603 )  | 11.5268 ( 1.02266 )  | 0.14502    | 0.47208             | 0.48827             |
| 28 Other Digestive Organs    | 2.9486 ( 1.25248 )   | 4.0027 ( 1.31273 )   | 0.23060    | 0.57471             | 0.58863             |
| 29 Respiratory System        | 1.1074 ( 0.14308 )   | -0.8987 ( 0.13886 )  | 0.02534    | 0.00000             | 0.00000             |
| 30 Nose, Nasal Cavity and Mi | -2.7924 ( 0.50534 )  | -1.6394 ( 0.87092 )  | 0.12798    | 0.26870             | 0.28641             |
| 31 Larynx                    | -0.9160 ( 0.31894 )  | -3.1695 ( 0.99551 )  | 0.13286    | 0.03732             | 0.04476             |
| 32 Lung and Bronchus         | 1.1684 ( 0.14263 )   | -0.8594 ( 0.13851 )  | 0.02527    | 0.00000             | 0.00000             |
| 33 Trachea, Mediastinum and  | -4.1474 ( 0.51934 )  | -3.7029 ( 1.76282 )  | 0.23357    | 0.81526             | 0.82183             |
| 34 Bones and Joints          | -0.3413 ( 0.23101 )  | -0.0312 ( 0.59852 )  | 0.08154    | 0.64064             | 0.65278             |
| 35 Soft Tissue including Hea | -0.3137 ( 0.50341 )  | -2.3136 ( 0.59262 )  | 0.09883    | 0.01298             | 0.01665             |
| 36 Skin excluding Basal and  | -0.6894 ( 0.10824 )  | -1.7968 ( 0.25599 )  | 0.03532    | 0.00012             | 0.00021             |
| 37 Melanoma of the Skin      | -0.6677 ( 0.13053 )  | -2.2282 ( 0.27928 )  | 0.03918    | 0.00000             | 0.00000             |
| 38 Other Non-Epithelial Skin | -0.7827 ( 0.28864 )  | 0.1701 ( 0.86128 )   | 0.11545    | 0.31098             | 0.32882             |
| 39 Breast                    | -2.1080 ( 0.09911 )  | -2.4052 ( 0.12810 )  | 0.02059    | 0.07627             | 0.08752             |
| 40 Female Genital System     | -0.7757 ( 0.06950 )  | -0.8266 ( 0.13887 )  | 0.01974    | 0.75116             | 0.75988             |
| 41 Cervix Uteri              | -2.5485 ( 0.16808 )  | -2.7864 ( 0.30711 )  | 0.04450    | 0.51164             | 0.52704             |
| 42 Corpus and Uterus, NOS    | -0.3500 ( 0.08836 )  | -0.4197 ( 0.22008 )  | 0.03014    | 0.77630             | 0.78419             |
| 43 Corpus Uteri              | -0.9847 ( 0.10858 )  | -1.6515 ( 0.29045 )  | 0.03941    | 0.03779             | 0.04529             |
| 44 Uterus, NOS               | 0.2709 ( 0.20775 )   | 0.6246 ( 0.30305 )   | 0.04670    | 0.35242             | 0.37012             |
| 45 Ovary                     | -0.4497 ( 0.10827 )  | -0.3897 ( 0.19006 )  | 0.02780    | 0.79108             | 0.79847             |
| 46 Vagina                    | -1.4893 ( 0.30881 )  | -0.0450 ( 1.12439 )  | 0.14820    | 0.23152             | 0.24885             |
| 47 Vulva                     | 0.3715 ( 0.21886 )   | -0.4401 ( 0.74207 )  | 0.09833    | 0.31091             | 0.32875             |
| 48 Other Female Genital Orga | 1.0285 ( 0.89011 )   | -2.8798 ( 1.05902 )  | 0.17583    | 0.00636             | 0.00854             |
| 49 Urinary System            | -0.1898 ( 0.10186 )  | -0.3737 ( 0.25074 )  | 0.03440    | 0.51161             | 0.52701             |
| 50 Urinary Bladder           | -0.3297 ( 0.12862 )  | -0.2421 ( 0.36919 )  | 0.04969    | 0.82869             | 0.83480             |
| 51 Kidney and Renal Pelvis   | -0.0759 ( 0.17167 )  | -0.5114 ( 0.23849 )  | 0.03735    | 0.15231             | 0.16770             |
| 52 Ureter                    | -1.1593 ( 0.53854 )  | -0.4319 ( 1.29441 )  | 0.17819    | 0.61627             | 0.62909             |
| 53 Other Urinary Organs      | 0.97551 ( 0.98382 )  | 0.51241 ( 1.65580 )  | 0.24479    | 0.81634             | 0.82288             |
| 54 Eye and Orbit             | -2.29495 ( 0.51385 ) | -1.09212 ( 1.83285 ) | 0.24193    | 0.54163             | 0.55636             |
| 55 Brain and Other Nervous S | -0.60288 ( 0.15861 ) | -0.78950 ( 0.24186 ) | 0.03676    | 0.53314             | 0.54807             |
| 56 Endocrine System          | -0.03612 ( 0.17458 ) | -0.82845 ( 0.57794 ) | 0.07673    | 0.20493             | 0.22180             |
| 57 Thyroid                   | 0.19503 ( 0.22603 )  | -0.11015 ( 0.52083 ) | 0.07216    | 0.60363             | 0.61680             |
| 58 Other Endocrine including | -0.40304 ( 0.20725 ) | -2.21315 ( 0.99215 ) | 0.12882    | 0.08453             | 0.09640             |
| 59 Lymphoma                  | 0.01028 ( 0.29109 )  | -1.31900 ( 0.40750 ) | 0.06365    | 0.01035             | 0.01347             |
| 60 Hodgkin Lymphoma          | -2.55202 ( 0.28254 ) | -1.53544 ( 0.79565 ) | 0.10731    | 0.24484             | 0.26234             |
| 61 Non-Hodgkin Lymphoma      | 0.18531 ( 0.30940 )  | -1.29605 ( 0.41882 ) | 0.06618    | 0.00600             | 0.00809             |
| 62 Myeloma                   | 0.19767 ( 0.15648 )  | -0.87526 ( 0.33092 ) | 0.04652    | 0.00464             | 0.00636             |
| 63 Leukemia                  | -0.47456 ( 0.09093 ) | -1.19624 ( 0.15836 ) | 0.02321    | 0.00013             | 0.00023             |
| 64 Lymphocytic Leukemia      | -0.71969 ( 0.22034 ) | -1.55322 ( 0.35934 ) | 0.05357    | 0.05613             | 0.06563             |
| 65 Acute Lymphocytic Leukemi | -1.33321 ( 0.27870 ) | -0.40742 ( 0.54511 ) | 0.07781    | 0.14412             | 0.15920             |
| 66 Chronic Lymphocytic Leuke | -0.11289 ( 0.28829 ) | -1.78207 ( 0.46202 ) | 0.06922    | 0.00307             | 0.00433             |
| 67 Other Lymphocytic Leukemi | -4.18929 ( 0.22281 ) | -5.55778 ( 1.60359 ) | 0.20577    | 0.41424             | 0.43134             |
| 68 Myeloid and Monocytic Leu | 0.19180 ( 0.09133 )  | -0.37999 ( 0.29947 ) | 0.03979    | 0.07772             | 0.08909             |
| 69 Acute Myeloid Leukemia    | 1.60735 ( 0.11928 )  | 1.22486 ( 0.30773 )  | 0.04195    | 0.26296             | 0.28063             |
| 70 Acute Monocytic Leukemia  | -7.75354 ( 0.82563 ) | -9.06558 ( 3.75654 ) | 0.48884    | 0.74178             | 0.75081             |
| 71 Chronic Myeloid Leukemia  | -4.29532 ( 0.63553 ) | -7.22987 ( 0.99391 ) | 0.14994    | 0.01628             | 0.02057             |
| 72 Other Myeloid/Monocytic L | 1.78219 ( 1.33592 )  | 5.14116 ( 1.49323 )  | 0.25465    | 0.10538             | 0.11859             |
| 73 Other Leukemia            | -1.37872 ( 0.11477 ) | -2.39493 ( 0.25479 ) | 0.03552    | 0.00044             | 0.00071             |
| 74 Other Acute Leukemia      | -3.25827 ( 0.25236 ) | -4.90300 ( 0.39909 ) | 0.06001    | 0.00077             | 0.00118             |
| 75 Aleukemic, Subleukemic an | 0.67118 ( 0.13108 )  | 0.46868 ( 0.40711 )  | 0.05436    | 0.64745             | 0.65939             |
| 76 Miscellaneous Malignant C | -0.11415 ( 0.29840 ) | -0.54259 ( 0.28608 ) | 0.05254    | 0.31678             | 0.33461             |

Table B.1: Comparison of Changes in Age-adjusted cancer mortality rates between California (1990-2004) and the US (1980-1994) for males.  $APC_{us}$  and  $APC_{ca}$  are the annual percent changes for the US and California respectively.  $\sigma^2$  is the common (residual) variance in the Cancer Rate Regression Models (6) and (7).

| sites                        | $APC_{us}$ (SE)      | $APC_{ca}$ (SE)      | $\sigma^2$ | p-value (Z-test) | p-value (t-test) |
|------------------------------|----------------------|----------------------|------------|------------------|------------------|
| 1 All Malignant Cancers      | 0.13395 ( 0.05004 )  | -1.69304 ( 0.05924 ) | 0.00986    | 0.00000          | 0.00000          |
| 2 Oral Cavity and Pharynx    | -2.09739 ( 0.12845 ) | -2.36549 ( 0.30387 ) | 0.04193    | 0.46045          | 0.44932          |
| 3 Lip                        | -6.33929 ( 0.87302 ) | -2.89026 ( 2.28470 ) | 0.31086    | 0.20026          | 0.18925          |
| 4 Tongue                     | -2.22245 ( 0.15640 ) | -1.55945 ( 0.48771 ) | 0.06510    | 0.23971          | 0.22816          |
| 5 Salivary Gland             | -0.45950 ( 0.39389 ) | -2.69678 ( 0.88342 ) | 0.12294    | 0.03566          | 0.03129          |
| 6 Floor of Mouth             | -6.78522 ( 0.25603 ) | -4.60891 ( 1.60742 ) | 0.20688    | 0.22460          | 0.21323          |
| 7 Gum and Other Mouth        | -3.05074 ( 0.23408 ) | -4.57622 ( 0.45483 ) | 0.06501    | 0.00676          | 0.00652          |
| 8 Nasopharynx                | -1.06262 ( 0.31636 ) | -2.52804 ( 0.67281 ) | 0.09449    | 0.07342          | 0.06652          |
| 9 Tonsil                     | -2.82023 ( 0.38469 ) | -0.51149 ( 0.97421 ) | 0.13312    | 0.04528          | 0.04017          |
| 10 Oropharynx                | 0.19700 ( 0.37195 )  | -0.57017 ( 0.97536 ) | 0.13267    | 0.50446          | 0.49387          |
| 11 Hypopharynx               | -4.45059 ( 0.48011 ) | -3.08101 ( 0.99334 ) | 0.14022    | 0.25954          | 0.24782          |
| 12 Other Oral Cavity and Pha | -0.22622 ( 0.32481 ) | -2.39696 ( 0.72259 ) | 0.10069    | 0.01282          | 0.01075          |
| 13 Digestive System          | -0.68619 ( 0.03274 ) | -1.03053 ( 0.06669 ) | 0.00944    | 0.00003          | 0.00002          |
| 14 Esophagus                 | 1.02825 ( 0.06092 )  | 0.03682 ( 0.26946 )  | 0.03511    | 0.00112          | 0.00083          |
| 15 Stomach                   | -2.03063 ( 0.11464 ) | -2.74636 ( 0.15274 ) | 0.02427    | 0.00066          | 0.00048          |
| 16 Small Intestine           | 0.73969 ( 0.33065 )  | -2.28962 ( 0.82727 ) | 0.11323    | 0.00201          | 0.00155          |
| 17 Colon and Rectum          | -1.24173 ( 0.08356 ) | -2.30563 ( 0.10036 ) | 0.01660    | 0.00000          | 0.00000          |
| 18 Colon excluding Rectum    | -0.98791 ( 0.12656 ) | -2.36600 ( 0.11226 ) | 0.02150    | 0.00000          | 0.00000          |
| 19 Rectum and Rectosigmoid J | -2.60904 ( 0.19370 ) | -2.00738 ( 0.31554 ) | 0.04706    | 0.13996          | 0.13033          |
| 20 Liver and Intrahepatic Bi | 3.05617 ( 0.12756 )  | 2.85857 ( 0.19285 )  | 0.02939    | 0.43764          | 0.42628          |
| 21 Liver                     | 2.31517 ( 0.14534 )  | 2.71266 ( 0.22187 )  | 0.03371    | 0.17348          | 0.16298          |
| 22 Intrahepatic Bile Duct    | 9.01465 ( 0.30636 )  | 3.73589 ( 0.51502 )  | 0.07616    | 0.00000          | 0.00000          |
| 23 Gallbladder               | -2.64656 ( 0.24536 ) | -1.53995 ( 0.48949 ) | 0.06959    | 0.06641          | 0.05990          |
| 24 Other Biliary             | -2.81449 ( 0.18682 ) | -3.65275 ( 0.53714 ) | 0.07228    | 0.18065          | 0.17000          |
| 25 Pancreas                  | -0.40317 ( 0.05874 ) | -0.39426 ( 0.19401 ) | 0.02576    | 0.96816          | 0.96737          |
| 26 Retroperitoneum           | -5.63701 ( 0.49823 ) | -2.68420 ( 1.11387 ) | 0.15509    | 0.02796          | 0.02427          |
| 27 Peritoneum, Omentum and M | -0.31829 ( 0.89814 ) | 4.60791 ( 1.42707 )  | 0.21431    | 0.00797          | 0.00653          |
| 28 Other Digestive Organs    | -4.00785 ( 0.30807 ) | 3.54776 ( 2.10751 )  | 0.27071    | 0.00127          | 0.00096          |
| 29 Respiratory System        | 0.15618 ( 0.10760 )  | -2.54261 ( 0.08343 ) | 0.01730    | 0.00000          | 0.00000          |
| 30 Nose, Nasal Cavity and Mi | -2.16152 ( 0.27623 ) | -3.71470 ( 1.15055 ) | 0.15039    | 0.23318          | 0.22170          |
| 31 Larynx                    | -0.63743 ( 0.09716 ) | -2.21785 ( 0.41215 ) | 0.05382    | 0.00070          | 0.00051          |
| 32 Lung and Bronchus         | 0.20164 ( 0.11152 )  | -2.53538 ( 0.08350 ) | 0.01771    | 0.00000          | 0.00000          |
| 33 Pleura                    | 0.49245 ( 0.40844 )  | -5.63373 ( 0.83073 ) | 0.11766    | 0.00000          | 0.00000          |
| 34 Trachea, Mediastinum and  | -3.84059 ( 0.35496 ) | -4.21490 ( 1.43052 ) | 0.18733    | 0.81758          | 0.81310          |
| 35 Bones and Joints          | -1.03432 ( 0.41720 ) | 0.50710 ( 0.56841 )  | 0.08961    | 0.04708          | 0.04183          |
| 36 Soft Tissue including Hea | 1.03457 ( 0.10806 )  | -1.86636 ( 0.56160 ) | 0.07269    | 0.00000          | 0.00000          |
| 37 Skin excluding Basal and  | 1.48499 ( 0.21683 )  | -0.92676 ( 0.29656 ) | 0.04669    | 0.00000          | 0.00000          |
| 38 Melanoma of the Skin      | 1.65189 ( 0.13590 )  | -1.14511 ( 0.35312 ) | 0.04809    | 0.00000          | 0.00000          |
| 39 Other Non-Epithelial Skin | 1.10131 ( 0.47089 )  | -0.34737 ( 0.61161 ) | 0.09811    | 0.08827          | 0.08060          |
| 40 Breast                    | 0.40317 ( 0.47453 )  | -0.35521 ( 1.08577 ) | 0.15060    | 0.56104          | 0.55129          |
| 41 Male Genital System       | 1.38340 ( 0.11120 )  | -3.35652 ( 0.22018 ) | 0.03135    | 0.00000          | 0.00000          |
| 42 Prostate                  | 1.45612 ( 0.11206 )  | -3.40124 ( 0.21988 ) | 0.03137    | 0.00000          | 0.00000          |
| 43 Testis                    | -3.17493 ( 0.29347 ) | -1.31581 ( 0.90241 ) | 0.12061    | 0.07517          | 0.06817          |
| 44 Penis                     | -2.15477 ( 0.41309 ) | 0.44102 ( 1.74277 )  | 0.22764    | 0.18806          | 0.17726          |
| 45 Urinary System            | -0.28045 ( 0.08727 ) | -0.46994 ( 0.10662 ) | 0.01751    | 0.21163          | 0.20044          |
| 46 Urinary Bladder           | -1.12675 ( 0.16025 ) | -0.66431 ( 0.19502 ) | 0.03208    | 0.09612          | 0.08809          |
| 47 Kidney and Renal Pelvis   | 1.00260 ( 0.09281 )  | -0.20732 ( 0.16686 ) | 0.02427    | 0.00000          | 0.00000          |
| 48 Ureter                    | -1.06126 ( 0.43471 ) | -3.05155 ( 1.85441 ) | 0.24208    | 0.34258          | 0.33066          |
| 49 Other Urinary Organs      | -2.59350 ( 0.62897 ) | 4.13840 ( 2.59886 )  | 0.33984    | 0.02222          | 0.01909          |
| 50 Eye and Orbit             | -1.74425 ( 0.43342 ) | 2.06275 ( 1.37227 )  | 0.18291    | 0.01627          | 0.01379          |
| 51 Brain and Other Nervous S | 0.85214 ( 0.10548 )  | -0.76199 ( 0.27160 ) | 0.03703    | 0.00000          | 0.00000          |
| 52 Endocrine System          | -0.08767 ( 0.18546 ) | 0.94815 ( 0.49324 )  | 0.06698    | 0.07421          | 0.06726          |
| 53 Thyroid                   | 0.06835 ( 0.26616 )  | 2.55398 ( 0.66252 )  | 0.09075    | 0.00157          | 0.00119          |
| 54 Other Endocrine including | -0.24578 ( 0.25539 ) | -0.90111 ( 0.73065 ) | 0.09837    | 0.44189          | 0.43057          |
| 55 Lymphoma                  | 2.05381 ( 0.10812 )  | -0.90577 ( 0.31011 ) | 0.04174    | 0.00000          | 0.00000          |
| 56 Hodgkin Lymphoma          | -3.66815 ( 0.28420 ) | -2.91687 ( 0.50752 ) | 0.07393    | 0.24076          | 0.22921          |
| 57 Non-Hodgkin Lymphoma      | 2.66716 ( 0.12986 )  | -0.76903 ( 0.33308 ) | 0.04544    | 0.00000          | 0.00000          |
| 58 Myeloma                   | 1.44945 ( 0.08579 )  | -0.63384 ( 0.28698 ) | 0.03807    | 0.00000          | 0.00000          |
| 59 Leukemia                  | -0.31509 ( 0.08696 ) | -1.16978 ( 0.18611 ) | 0.02611    | 0.00016          | 0.00011          |
| 60 Lymphocytic Leukemia      | -0.06745 ( 0.15905 ) | -1.43414 ( 0.38148 ) | 0.05253    | 0.00267          | 0.00208          |
| 61 Acute Lymphocytic Leukemi | -1.07408 ( 0.23533 ) | -0.61542 ( 0.70555 ) | 0.09453    | 0.57541          | 0.56590          |
| 62 Chronic Lymphocytic Leuke | 0.88433 ( 0.25397 )  | -1.58381 ( 0.39517 ) | 0.05970    | 0.00000          | 0.00000          |
| 63 Other Lymphocytic Leukemi | -4.22759 ( 0.26089 ) | -2.84172 ( 1.08602 ) | 0.14196    | 0.25976          | 0.24804          |
| 64 Myeloid and Monocytic Leu | -1.23576 ( 0.19512 ) | -0.34155 ( 0.26334 ) | 0.04166    | 0.01321          | 0.01109          |
| 65 Acute Myeloid Leukemia    | -0.78771 ( 0.25898 ) | 1.27926 ( 0.25779 )  | 0.04644    | 0.00000          | 0.00000          |
| 66 Acute Monocytic Leukemia  | -5.35300 ( 0.52077 ) | -5.81060 ( 1.38431 ) | 0.18798    | 0.77870          | 0.77332          |
| 67 Chronic Myeloid Leukemia  | -0.58622 ( 0.16262 ) | -7.48499 ( 0.97162 ) | 0.12521    | 0.00000          | 0.00000          |
| 68 Other Myeloid/Monocytic L | -7.31063 ( 0.43678 ) | 4.63431 ( 2.02953 )  | 0.26385    | 0.00000          | 0.00000          |
| 69 Other Leukemia            | 1.00458 ( 0.22000 )  | -2.35890 ( 0.35968 ) | 0.05359    | 0.00000          | 0.00000          |
| 70 Other Acute Leukemia      | 1.57263 ( 0.29680 )  | -4.26489 ( 0.44006 ) | 0.06746    | 0.00000          | 0.00000          |
| 71 Aleukemic, Subleukemic an | 0.37945 ( 0.25853 )  | -0.13660 ( 0.44085 ) | 0.06496    | 0.35908          | 0.34720          |
| 72 Miscellaneous Malignant C | -0.10363 ( 0.23525 ) | -0.04692 ( 0.33004 ) | 0.05151    | 0.89888          | 0.89637          |

Table B.2: Comparison of Changes in Age-adjusted cancer mortality rates between California (1990-2004) and the US (1980-1994) for females.

| sites                        | $APC_{us}$ (SE)      | $APC_{ca}$ (SE)      | $\sigma^2$ | p-value (Z-test) | p-value (t-test) |
|------------------------------|----------------------|----------------------|------------|------------------|------------------|
| 1 All Malignant Cancers      | 0.40400 ( 0.03737 )  | -1.1995 ( 0.07756 )  | 0.01094    | 0.00000          | 0.00000          |
| 2 Oral Cavity and Pharynx    | -1.35357 ( 0.09378 ) | -2.6478 ( 0.32027 )  | 0.04241    | 0.00042          | 0.00031          |
| 3 Tongue                     | -1.33078 ( 0.19952 ) | -1.9406 ( 0.56414 )  | 0.07605    | 0.35408          | 0.34273          |
| 4 Salivary Gland             | -0.79551 ( 0.27112 ) | -1.6580 ( 1.53080 )  | 0.19759    | 0.61392          | 0.60550          |
| 5 Floor of Mouth             | -4.07290 ( 0.32488 ) | -10.3092 ( 1.46769 ) | 0.19106    | 0.00016          | 0.00011          |
| 6 Gum and Other Mouth        | -1.43953 ( 0.25762 ) | -3.5480 ( 0.89911 )  | 0.11887    | 0.04038          | 0.03585          |
| 7 Nasopharynx                | -0.88013 ( 0.29470 ) | -1.7402 ( 1.07235 )  | 0.14135    | 0.48192          | 0.47154          |
| 8 Tonsil                     | -3.36049 ( 0.37876 ) | -3.0276 ( 1.09826 )  | 0.14765    | 0.79443          | 0.78964          |
| 9 Oropharynx                 | 0.53419 ( 0.70546 )  | -1.4113 ( 1.74661 )  | 0.23941    | 0.34767          | 0.33631          |
| 10 Hypopharynx               | -3.84815 ( 0.54731 ) | -2.0945 ( 2.10828 )  | 0.27684    | 0.46413          | 0.45355          |
| 11 Other Oral Cavity and Pha | -0.08469 ( 0.37118 ) | -2.6857 ( 0.96831 )  | 0.13180    | 0.02257          | 0.01954          |
| 12 Digestive System          | -1.05530 ( 0.04113 ) | -1.0174 ( 0.08568 )  | 0.01208    | 0.71694          | 0.71049          |
| 13 Esophagus                 | -0.02695 ( 0.10507 ) | -0.4936 ( 0.44040 )  | 0.05755    | 0.34862          | 0.33726          |
| 14 Stomach                   | -2.19679 ( 0.11168 ) | -2.2361 ( 0.26341 )  | 0.03636    | 0.90055          | 0.89819          |
| 15 Small Intestine           | 0.49738 ( 0.23347 )  | -1.1258 ( 0.59587 )  | 0.08134    | 0.02110          | 0.01822          |
| 16 Colon and Rectum          | -1.71438 ( 0.06537 ) | -2.1068 ( 0.12624 )  | 0.01807    | 0.01207          | 0.01017          |
| 17 Colon excluding Rectum    | -1.56494 ( 0.09316 ) | -2.0724 ( 0.12469 )  | 0.01978    | 0.00303          | 0.00240          |
| 18 Rectum and Rectosigmoid J | -2.70471 ( 0.26231 ) | -2.3023 ( 0.35657 )  | 0.05626    | 0.40840          | 0.39733          |
| 19 Anus, Anal Canal and Anor | 1.54210 ( 0.37044 )  | 1.4404 ( 0.50560 )   | 0.07966    | 0.88270          | 0.87993          |
| 20 Liver and Intrahepatic Bi | 2.41870 ( 0.16904 )  | 2.8416 ( 0.25130 )   | 0.03849    | 0.20425          | 0.19367          |
| 21 Liver                     | 1.17094 ( 0.20476 )  | 2.2415 ( 0.30421 )   | 0.04661    | 0.00794          | 0.00657          |
| 22 Intrahepatic Bile Duct    | 8.52092 ( 0.33496 )  | 4.6627 ( 0.45037 )   | 0.07134    | 0.00000          | 0.00000          |
| 23 Gallbladder               | -2.94543 ( 0.15996 ) | -1.7201 ( 0.32906 )  | 0.04650    | 0.00233          | 0.00182          |
| 24 Other Biliary             | -3.13665 ( 0.17143 ) | -3.2242 ( 0.98554 )  | 0.12714    | 0.93656          | 0.93505          |
| 25 Pancreas                  | 0.34744 ( 0.06179 )  | -0.3244 ( 0.14192 )  | 0.01967    | 0.00008          | 0.00005          |
| 26 Retroperitoneum           | -4.32978 ( 0.40012 ) | -2.4084 ( 2.15884 )  | 0.27906    | 0.42619          | 0.41525          |
| 27 Peritoneum, Omentum and M | 4.51348 ( 0.89926 )  | 11.5268 ( 1.02266 )  | 0.17308    | 0.00000          | 0.00000          |
| 28 Other Digestive Organs    | -4.25304 ( 0.33605 ) | 4.0027 ( 1.31273 )   | 0.17223    | 0.00000          | 0.00000          |
| 29 Respiratory System        | 3.61472 ( 0.13458 )  | -0.8987 ( 0.13886 )  | 0.02458    | 0.00000          | 0.00000          |
| 30 Nose, Nasal Cavity and Mi | -0.70758 ( 0.43469 ) | -1.6394 ( 0.87092 )  | 0.12371    | 0.38404          | 0.37282          |
| 31 Larynx                    | 1.21371 ( 0.25728 )  | -3.1695 ( 0.99551 )  | 0.13068    | 0.00011          | 0.00007          |
| 32 Lung and Bronchus         | 3.71166 ( 0.13993 )  | -0.8594 ( 0.13851 )  | 0.02502    | 0.00000          | 0.00000          |
| 33 Trachea, Mediastinum and  | -2.31106 ( 0.38885 ) | -3.7029 ( 1.76282 )  | 0.22944    | 0.48327          | 0.47290          |
| 34 Bones and Joints          | -0.48883 ( 0.37556 ) | -0.0312 ( 0.59852 )  | 0.08981    | 0.55596          | 0.54658          |
| 35 Soft Tissue including Hea | 1.54851 ( 0.22162 )  | -2.3136 ( 0.59262 )  | 0.08042    | 0.00000          | 0.00000          |
| 36 Skin excluding Basal and  | 0.13866 ( 0.14570 )  | -1.7968 ( 0.25599 )  | 0.03744    | 0.00000          | 0.00000          |
| 37 Melanoma of the Skin      | 0.17192 ( 0.15360 )  | -2.2282 ( 0.27928 )  | 0.04051    | 0.00000          | 0.00000          |
| 38 Other Non-Epithelial Skin | 0.00164 ( 0.23994 )  | 0.1701 ( 0.86128 )   | 0.11363    | 0.86394          | 0.86073          |
| 39 Breast                    | -0.08345 ( 0.12945 ) | -2.4052 ( 0.12810 )  | 0.02315    | 0.00000          | 0.00000          |
| 40 Female Genital System     | -0.70389 ( 0.07288 ) | -0.8266 ( 0.13887 )  | 0.01993    | 0.47665          | 0.46621          |
| 41 Cervix Uteri              | -1.81997 ( 0.12578 ) | -2.7864 ( 0.30711 )  | 0.04218    | 0.00810          | 0.00671          |
| 42 Corpus and Uterus, NOS    | -1.45753 ( 0.09517 ) | -0.4197 ( 0.22008 )  | 0.03047    | 0.00008          | 0.00006          |
| 43 Corpus Uteri              | -1.25283 ( 0.14610 ) | -1.6515 ( 0.29045 )  | 0.04132    | 0.26488          | 0.25367          |
| 44 Uterus, NOS               | -1.66602 ( 0.18009 ) | 0.6246 ( 0.30305 )   | 0.04480    | 0.00000          | 0.00000          |
| 45 Ovary                     | 0.12034 ( 0.07301 )  | -0.3897 ( 0.19006 )  | 0.02588    | 0.02274          | 0.01969          |
| 46 Vagina                    | -1.52270 ( 0.33520 ) | -0.0450 ( 1.12439 )  | 0.14912    | 0.25213          | 0.24101          |
| 47 Vulva                     | -0.19144 ( 0.26520 ) | -0.4401 ( 0.74207 )  | 0.10016    | 0.77419          | 0.76896          |
| 48 Other Female Genital Orga | -0.51159 ( 0.45107 ) | -2.8798 ( 1.05902 )  | 0.14630    | 0.06138          | 0.05545          |
| 49 Urinary System            | 0.12841 ( 0.07580 )  | -0.3737 ( 0.25074 )  | 0.03329    | 0.08136          | 0.07437          |
| 50 Urinary Bladder           | -0.88939 ( 0.15915 ) | -0.2421 ( 0.36919 )  | 0.05110    | 0.14319          | 0.13390          |
| 51 Kidney and Renal Pelvis   | 1.17505 ( 0.15240 )  | -0.5114 ( 0.23849 )  | 0.03597    | 0.00000          | 0.00000          |
| 52 Ureter                    | -0.86113 ( 0.44480 ) | -0.4319 ( 1.29441 )  | 0.17396    | 0.77551          | 0.77031          |
| 53 Other Urinary Organs      | -1.59386 ( 0.32699 ) | 0.51241 ( 1.65580 )  | 0.21451    | 0.25648          | 0.24533          |
| 54 Eye and Orbit             | -2.35049 ( 0.44521 ) | -1.09212 ( 1.83285 ) | 0.23973    | 0.54409          | 0.53454          |
| 55 Brain and Other Nervous S | 0.96806 ( 0.12100 )  | -0.78950 ( 0.24186 ) | 0.03437    | 0.00000          | 0.00000          |
| 56 Endocrine System          | -0.64446 ( 0.20063 ) | -0.82845 ( 0.57794 ) | 0.07776    | 0.78450          | 0.77950          |
| 57 Thyroid                   | -1.08132 ( 0.26928 ) | -0.11015 ( 0.52083 ) | 0.07452    | 0.13204          | 0.12308          |
| 58 Other Endocrine including | 0.07706 ( 0.22568 )  | -2.21315 ( 0.99215 ) | 0.12932    | 0.04069          | 0.03613          |
| 59 Lymphoma                  | 1.61631 ( 0.06812 )  | -1.31900 ( 0.40750 ) | 0.05251    | 0.00000          | 0.00000          |
| 60 Hodgkin Lymphoma          | -3.46456 ( 0.24364 ) | -1.53544 ( 0.79565 ) | 0.10576    | 0.03503          | 0.03091          |
| 61 Non-Hodgkin Lymphoma      | 2.11389 ( 0.06817 )  | -1.29605 ( 0.41882 ) | 0.05393    | 0.00000          | 0.00000          |
| 62 Myeloma                   | 1.31123 ( 0.08985 )  | -0.87526 ( 0.33092 ) | 0.04358    | 0.00000          | 0.00000          |
| 63 Leukemia                  | -0.32315 ( 0.08684 ) | -1.19624 ( 0.15836 ) | 0.02295    | 0.00001          | 0.00001          |
| 64 Lymphocytic Leukemia      | -0.11952 ( 0.19751 ) | -1.55322 ( 0.35934 ) | 0.05212    | 0.00148          | 0.00113          |
| 65 Acute Lymphocytic Leukemi | -0.90026 ( 0.28043 ) | -0.40742 ( 0.54511 ) | 0.07791    | 0.46476          | 0.45419          |
| 66 Chronic Lymphocytic Leuke | 0.91209 ( 0.23062 )  | -1.78207 ( 0.46202 ) | 0.06563    | 0.00000          | 0.00000          |
| 67 Other Lymphocytic Leukemi | -4.62562 ( 0.39316 ) | -5.55778 ( 1.60359 ) | 0.20985    | 0.60770          | 0.59917          |
| 68 Myeloid and Monocytic Leu | -1.23508 ( 0.15510 ) | -0.37999 ( 0.29947 ) | 0.04286    | 0.02114          | 0.01826          |
| 69 Acute Myeloid Leukemia    | -0.75770 ( 0.17158 ) | 1.22486 ( 0.30773 )  | 0.04478    | 0.00000          | 0.00000          |
| 70 Acute Monocytic Leukemia  | -4.54293 ( 0.54879 ) | -9.06558 ( 3.75654 ) | 0.48252    | 0.27871          | 0.26741          |
| 71 Chronic Myeloid Leukemia  | -0.77315 ( 0.24368 ) | -7.22987 ( 0.99391 ) | 0.13007    | 0.00000          | 0.00000          |
| 72 Other Myeloid/Monocytic L | -7.61620 ( 0.54563 ) | 5.14116 ( 1.49323 )  | 0.20206    | 0.00000          | 0.00000          |
| 73 Other Leukemia            | 1.14041 ( 0.20278 )  | -2.39493 ( 0.25479 ) | 0.04139    | 0.00000          | 0.00000          |
| 74 Other Acute Leukemia      | 1.45185 ( 0.30917 )  | -4.90300 ( 0.39909 ) | 0.06416    | 0.00000          | 0.00000          |
| 75 Aleukemic, Subleukemic an | 0.75916 ( 0.16949 )  | 0.46868 ( 0.40711 )  | 0.05605    | 0.54922          | 0.53974          |
| 76 Miscellaneous Malignant C | -0.36323 ( 0.16305 ) | -0.54259 ( 0.28608 ) | 0.04185    | 0.62040          | 0.61209          |
